# Supplementary material for: Effectiveness of a Novel ω-3 Krill Oil Agent in Patients With Severe Hypertriglyceridemia: A Randomized Clinical Trial
Source: PubMed Central journal article supplement — JAMA Netw Open. 2022 Jan 6;5(1):e2141898. doi: 10.1001/jamanetworkopen.2021.41898 (PMC8739762; doi:10.1001/jamanetworkopen.2021.41898), 2022-01-06
Supplement: jamanetwopen-e2141898-s003.pdf [file jamanetwopen-e2141898-s003.pdf]

\*Indicates required information. Only first name, last name, and suffix will appear in PubMed.

| <b>*Group Name(s): TRILOGY (Study of CaPre in Lowering Very High Triglycerides) investigators</b> |                   |                              |                  |                                           |                                          |                                                         |                                                                                            |
|---------------------------------------------------------------------------------------------------|-------------------|------------------------------|------------------|-------------------------------------------|------------------------------------------|---------------------------------------------------------|--------------------------------------------------------------------------------------------|
| <b>*First Name and Middle Initial(s)</b>                                                          | <b>*Last Name</b> | <b>*Suffix (eg, Jr, III)</b> | Academic Degrees | Institution                               | Location (city, state/province, country) | Role or Contribution, eg, chair, principal investigator | Group (if more than 1 Group listed in the byline) and/or Subgroup (eg, Steering Committee) |
| Tao                                                                                               | Hao               |                              | Ph.D             | Harvard Chan School of Public Health      | Boston, MA, USA                          | Statistical analyses                                    |                                                                                            |
| Lubna                                                                                             | Mirza             |                              |                  | Lynn Institute of Norman                  | Norman, OK                               | principal investigator                                  |                                                                                            |
| Gaylon                                                                                            | Kipp              |                              |                  | Northwest Clinical Research Center        | Bellevue, WA                             | principal investigator                                  |                                                                                            |
| Wentworth                                                                                         | Jarrett           |                              |                  | Alpha Science Research                    | Miami, FL                                | principal investigator                                  |                                                                                            |
| Raymond                                                                                           | Little            |                              |                  | Houston Heart & Vascular Associates       | Kingwood, TX                             | principal investigator                                  |                                                                                            |
| Hipolito                                                                                          | Mariano           |                              |                  | Research Center of Fresno                 | Fresno, CA                               | principal investigator                                  |                                                                                            |
| Nagapradeep                                                                                       | Nagajothi         |                              |                  | Aultman Hospital                          | Canton, OH                               | principal investigator                                  |                                                                                            |
| Kevin                                                                                             | Bender            |                              |                  | DBC Research                              | Tamarac, FL                              | principal investigator                                  |                                                                                            |
| Brian                                                                                             | Everhart          |                              |                  | Heritage Valley Medical Group             | Beaver, PA                               | principal investigator                                  |                                                                                            |
| Syed                                                                                              | Rahman            |                              |                  | Nexgen Medical Research                   | Atlanta, GA                              | principal investigator                                  |                                                                                            |
| Lisa                                                                                              | Usdan             |                              |                  | Clinical Neuroscience Solution            | Memphis, TN                              | principal investigator                                  |                                                                                            |
| David                                                                                             | Larsen            |                              |                  | Wasatch Clinical Research                 | Salt Lake City, UT                       | principal investigator                                  |                                                                                            |
| John                                                                                              | McGettigan        |                              |                  | Quality of Life Medical & Research Center | Tucson, AZ                               | principal investigator                                  |                                                                                            |
| Roohi                                                                                             | Faiyaz            |                              |                  | RNA America Health Sciences               | Sugar Hill, GA                           | principal investigator                                  |                                                                                            |

## Supplemental Online Content: Nonauthor Collaborators

\*Indicates required information. Only first name, last name, and suffix will appear in PubMed.

| *First Name and Middle Initial(s) | *Last Name | *Suffix (eg, Jr, III) | Academic Degrees | Institution                          | Location (city, state/province, country) | Role or Contribution, eg, chair, principal investigator | Group (if more than 1 Group listed in the byline) and/or Subgroup (eg, Steering Committee) |
|-----------------------------------|------------|-----------------------|------------------|--------------------------------------|------------------------------------------|---------------------------------------------------------|--------------------------------------------------------------------------------------------|
| Jean                              | Foucauld   |                       |                  | Cardiology Partners                  | Wellington, FL                           | principal investigator                                  |                                                                                            |
| Calvin                            | Higgins    |                       |                  | C&R Research Services USA            | Coral Gables, FL                         | principal investigator                                  |                                                                                            |
| Fadi                              | Chalhoub   |                       |                  | Clinical Neuroscience Solution       | Jacksonville, FL                         | principal investigator                                  |                                                                                            |
| William                           | Freeman    |                       |                  | Freeman Family Medicine Clinic       | Conway, AR                               | principal investigator                                  |                                                                                            |
| Steven                            | Corse      |                       |                  | Meridian Clinical Research           | Savannah, GA                             | principal investigator                                  |                                                                                            |
| Stephen                           | Miller     |                       |                  | Advanced Clinical Research           | Salt Lake City, UT                       | principal investigator                                  |                                                                                            |
| Amol                              | Malanakar  |                       |                  | Care Research Center                 | Kendall, FL                              | principal investigator                                  |                                                                                            |
| Michael                           | Reschak    |                       |                  | Medex Healthcare Research            | St.Louis, MO                             | principal investigator                                  |                                                                                            |
| Mahendra                          | Jain       |                       |                  | Houston Methodist Research Institute | Pearland, TX                             | principal investigator                                  |                                                                                            |
| Adline                            | Ghazi      |                       |                  | MedStar Health Research Institute    | Baltimore, MD                            | principal investigator                                  |                                                                                            |
| Nizar                             | Daboul     |                       |                  | Advanced Medical Research            | Maumee, OH                               | principal investigator                                  |                                                                                            |
| Natalia                           | Hegedosh   |                       |                  | Global Research Solutions            | Miami, FL                                | principal investigator                                  |                                                                                            |
| Mark                              | McKenzie   |                       |                  | WR-ClinSearch                        | Chattanooga, TN                          | principal investigator                                  |                                                                                            |
| Marina                            | Raikhel    |                       |                  | Torrance Clinical Research Institute | Lomita, CA                               | principal investigator                                  |                                                                                            |
| John                              | Dodd       |                       |                  | Elite Clinical Research              | Jackson, MS                              | principal investigator                                  |                                                                                            |

## Supplemental Online Content: Nonauthor Collaborators

\*Indicates required information. Only first name, last name, and suffix will appear in PubMed.

| *First Name and Middle Initial(s) | *Last Name  | *Suffix (eg, Jr, III) | Academic Degrees | Institution                                   | Location (city, state/province, country) | Role or Contribution, eg, chair, principal investigator | Group (if more than 1 Group listed in the byline) and/or Subgroup (eg, Steering Committee) |
|-----------------------------------|-------------|-----------------------|------------------|-----------------------------------------------|------------------------------------------|---------------------------------------------------------|--------------------------------------------------------------------------------------------|
| Leonard                           | Dunn        |                       |                  | Clinical Research of West Florida             | Clearwater, FL                           | principal investigator                                  |                                                                                            |
| Stephan                           | Jannach     |                       |                  | Spectrum Medical                              | Danville, VA                             | principal investigator                                  |                                                                                            |
| Stanislaw                         | Sojka       |                       |                  | Methodist Physicians Clinic Heart Consultants | Omaha, NE                                | principal investigator                                  |                                                                                            |
| Howard                            | Sherman     |                       |                  | Southern Maine Health Care                    | Portland, ME                             | principal investigator                                  |                                                                                            |
| James                             | Diener      |                       |                  | Cadillac Clinical Research                    | Cadillac, MI                             | principal investigator                                  |                                                                                            |
| Barry                             | Horowitz    |                       |                  | Metabolic Research Institute                  | West Palm Beach, FL                      | principal investigator                                  |                                                                                            |
| Marian                            | Shaw        |                       |                  | Advanced Clinical Research                    | Meridian, OH                             | principal investigator                                  |                                                                                            |
| Walter                            | Pharr       |                       |                  | Medication Management                         | Greensboro, NC                           | principal investigator                                  |                                                                                            |
| John                              | David Lentx |                       |                  | GA Clinical Research                          | Lawrenceville, GA                        | principal investigator                                  |                                                                                            |
| Enrique                           | Hanabergh   |                       |                  | L&C Professional Medical Research Institute   | Miami, FL                                | principal investigator                                  |                                                                                            |
| Randall                           | Miller      |                       |                  | Horizon Research Group of Opelousas           | Eunice, LA                               | principal investigator                                  |                                                                                            |
| Andres                            | Patron      |                       |                  | PatronMedical                                 | Pembroke Pines, FL                       | principal investigator                                  |                                                                                            |
| John                              | Agaiby      |                       |                  | Clinical Investigation Specialists            | Kenosha, WI                              | principal investigator                                  |                                                                                            |
| Michael                           | Feldman     |                       |                  | Clinical Research of Homestead                | Homestead, FL                            | principal investigator                                  |                                                                                            |
| Gilbert                           | Ledesma     |                       |                  | Arlington Family Research Center              | Arlington, TX                            | principal investigator                                  |                                                                                            |

## Supplemental Online Content: Nonauthor Collaborators

\*Indicates required information. Only first name, last name, and suffix will appear in PubMed.

| *First Name and Middle Initial(s) | *Last Name    | *Suffix (eg, Jr, III) | Academic Degrees | Institution                                | Location (city, state/province, country) | Role or Contribution, eg, chair, principal investigator | Group (if more than 1 Group listed in the byline) and/or Subgroup (eg, Steering Committee) |
|-----------------------------------|---------------|-----------------------|------------------|--------------------------------------------|------------------------------------------|---------------------------------------------------------|--------------------------------------------------------------------------------------------|
| Lidia                             | Rosa Bermudez |                       |                  | Universal Clinical Research                | Hialeah, FL                              | principal investigator                                  |                                                                                            |
| Preetham                          | Jetty         |                       |                  | Community Clinical Research Center         | Anderson, IN                             | principal investigator                                  |                                                                                            |
| Giselle                           | Debs-Perez    |                       |                  | Harmony Clinical Research                  | North Miami Beach, FL                    | principal investigator                                  |                                                                                            |
| Aslam                             | Loya          |                       |                  | Coastal Medical Group                      | Houston, TX                              | principal investigator                                  |                                                                                            |
| David                             | Butuk         |                       |                  | Solaris Clinical Research                  | Meridian, ID                             | principal investigator                                  |                                                                                            |
| Amy                               | Cullen        |                       |                  | Clinical Trial Investigators               | Tustin, CA                               | principal investigator                                  |                                                                                            |
| Chris                             | Recknor       |                       |                  | Center for Advanced Research and Education | Gaiverville, GA                          | principal investigator                                  |                                                                                            |
| Lon                               | Lynn          |                       |                  | Clinical Research of West Florida          | Tampa, FL                                | principal investigator                                  |                                                                                            |
| Lisa                              | Connery       |                       |                  | Intend Research                            | Norman, OK                               | principal investigator                                  |                                                                                            |
| Pedro                             | Ylisastigui   |                       |                  | Clinical Physiology Associates             | Fort Myers, FL                           | principal investigator                                  |                                                                                            |
| Randall                           | Huling        |                       |                  | Olive Branch Family Medical Center         | Olive Branch, MS                         | principal investigator                                  |                                                                                            |
| Marianela                         | Portilla      |                       |                  | Genoma Research Group                      | Miami, FL                                | principal investigator                                  |                                                                                            |
| Humberto                          | Cruz          |                       |                  | Florida Institute for Clinical Research    | Orlando, FL                              | principal investigator                                  |                                                                                            |
| Roberto                           | Sotolongo     |                       |                  | Research Institute of South Florida        | Miami, FL                                | principal investigator                                  |                                                                                            |
| Isaac                             | Dor           |                       |                  | Clinical Investigation Specialists         | Gurnee, IL                               | principal investigator                                  |                                                                                            |

## Supplemental Online Content: Nonauthor Collaborators

\*Indicates required information. Only first name, last name, and suffix will appear in PubMed.

| *First Name and Middle Initial(s) | *Last Name       | *Suffix (eg, Jr, III) | Academic Degrees | Institution                        | Location (city, state/province, country) | Role or Contribution, eg, chair, principal investigator | Group (if more than 1 Group listed in the byline) and/or Subgroup (eg, Steering Committee) |
|-----------------------------------|------------------|-----------------------|------------------|------------------------------------|------------------------------------------|---------------------------------------------------------|--------------------------------------------------------------------------------------------|
| Raul                              | Ebran-Gonzalez   |                       |                  | A+ Research                        | Miami, FL                                | principal investigator                                  |                                                                                            |
| Samuel                            | Lederman         |                       |                  | Altus Research                     | Lake Worth, FL                           | principal investigator                                  |                                                                                            |
| Omar                              | Benitez          |                       |                  | South Florida Research Center      | Miami, FL                                | principal investigator                                  |                                                                                            |
| James                             | Cain             |                       |                  | Family Medicine Clinic Science     | Lampasas, TX                             | principal investigator                                  |                                                                                            |
| Vivek                             | Awasty           |                       |                  | Awasty Research Network            | Marion, OH                               | principal investigator                                  |                                                                                            |
| Cindy                             | Martinez         |                       |                  | Project 4 Research                 | Miami, FL                                | principal investigator                                  |                                                                                            |
| Ramon                             | Hernandez        |                       |                  | City Medical Group                 | Miami, FL                                | principal investigator                                  |                                                                                            |
| Michael                           | Dao              |                       |                  | SC Clinical Research               | Garden Grove, CA                         | principal investigator                                  |                                                                                            |
| Antonio                           | Terrelonge       |                       |                  | Ocean Blue Medical Research Center | Miami, FL                                | principal investigator                                  |                                                                                            |
| Jennifer                          | Bellucci Jackson |                       |                  | Family Medicine Specialists CIS    | Wauconda, IL                             | principal investigator                                  |                                                                                            |
| Robert                            | Busch            |                       |                  | Albany Medical College             | Albany, NY                               | principal investigator                                  |                                                                                            |
| Sameul                            | Mujica Trenche   |                       |                  | Alas Science Clinical Research     | Las Vegas, NV                            | principal investigator                                  |                                                                                            |
| Kim                               | Barbel-Johnson   |                       |                  | Care Partners Clinical Research    | Jacksonville, FL                         | principal investigator                                  |                                                                                            |
| Carlos                            | Ince             |                       |                  | Spectrum Clinical Research         | Towson, Maryland                         | principal investigator                                  |                                                                                            |
| Bernard                           | Garcia           |                       |                  | Invesclinic LLC                    | Fort Lauderdale, FL                      | principal investigator                                  |                                                                                            |

Supplemental Online Content: Nonauthor Collaborators

\*Indicates required information. Only first name, last name, and suffix will appear in PubMed.

| *First Name and Middle Initial(s) | *Last Name       | *Suffix (eg, Jr, III) | Academic Degrees | Institution                            | Location (city, state/province, country) | Role or Contribution, eg, chair, principal investigator | Group (if more than 1 Group listed in the byline) and/or Subgroup (eg, Steering Committee) |
|-----------------------------------|------------------|-----------------------|------------------|----------------------------------------|------------------------------------------|---------------------------------------------------------|--------------------------------------------------------------------------------------------|
| Colby                             | Grossman         |                       |                  | Palmetto Clinical Research             | Summerville, SC                          | principal investigator                                  |                                                                                            |
| George                            | Mitchell Cornett |                       |                  | American Health Network of Indiana LLC | Franklin, IN                             | principal investigator                                  |                                                                                            |
| Faisal                            | Latif            |                       |                  | VA Medical Center                      | Oklahoma City, OK                        | principal investigator                                  |                                                                                            |
| Amer                              | Al-Karadsheh     |                       |                  | Endocrine IPS PLLC                     | Houston, TX                              | principal investigator                                  |                                                                                            |
| Robinson                          | Koilpillai       |                       |                  | Clinical Research of Central Florida   | Winter Haven, FL                         | principal investigator                                  |                                                                                            |
| Jorge                             | Alvarez-Moreno   |                       |                  | Coral Gables Clinical Research Inc     | Miami, FL                                | principal investigator                                  |                                                                                            |
| Krista                            | Preston          |                       |                  | Millennium Clinical Trials             | Thousand Oaks, CA                        | principal investigator                                  |                                                                                            |
| David                             | Wright           |                       |                  | Central Texas Clinical Research        | Austin, TX                               | principal investigator                                  |                                                                                            |
| John                              | Eck              |                       |                  | Advanced Clinical Research             | Boise, ID                                | principal investigator                                  |                                                                                            |
| Suzanne                           | Fussell          |                       |                  | Long Beach Clinical Trial Services Inc | Long Beach, CA                           | principal investigator                                  |                                                                                            |
| Javier                            | Reyna            |                       |                  | Sweet Hope Research Specialty          | Hialeah, FL                              | principal investigator                                  |                                                                                            |
| Royce Keith                       | Solano           |                       |                  | Davita Medical Group                   | Monument, CO                             | principal investigator                                  |                                                                                            |
| Joseph                            | Raof             |                       |                  | Encino Research Center                 | Encino, CA                               | principal investigator                                  |                                                                                            |
| Jean                              | Park             |                       |                  | MedStar Health Research Institute      | Hyattsville, MD                          | principal investigator                                  |                                                                                            |
| Hayes                             | Williams         |                       |                  | Achieve Clinical Research              | Birmingham, AL                           | principal investigator                                  |                                                                                            |

## Supplemental Online Content: Nonauthor Collaborators

\*Indicates required information. Only first name, last name, and suffix will appear in PubMed.

| *First Name and Middle Initial(s) | *Last Name | *Suffix (eg, Jr, III) | Academic Degrees | Institution                         | Location (city, state/province, country) | Role or Contribution, eg, chair, principal investigator | Group (if more than 1 Group listed in the byline) and/or Subgroup (eg, Steering Committee) |
|-----------------------------------|------------|-----------------------|------------------|-------------------------------------|------------------------------------------|---------------------------------------------------------|--------------------------------------------------------------------------------------------|
| Alan                              | Miller     |                       |                  | Alta Pharmaceutical                 | Dunwoody, GA                             | principal investigator                                  |                                                                                            |
| Robert                            | Remler     |                       |                  | Fellows Research Alliance           | Savannah, GA                             | principal investigator                                  |                                                                                            |
| Miguel                            | Trevino    |                       |                  | Innovative Research of West Florida | Clearwater, FL                           | principal investigator                                  |                                                                                            |
| Charles                           | Harper     |                       |                  | Meridian Clinical Research          | Norfolk, NE                              | principal investigator                                  |                                                                                            |
| Gordon                            | Connor     |                       |                  | ACE Research LLC                    | Birmingham, AL                           | principal investigator                                  |                                                                                            |
| Nayvis                            | Iglesias   |                       |                  | Medical Research Center Miami II    | Miami, FL                                | principal investigator                                  |                                                                                            |
| Sashi                             | Makam      |                       |                  | Mid Hudson Medical Research         | New Windsor, NY                          | principal investigator                                  |                                                                                            |
| Staci                             | Jordan     |                       |                  | Overland Park Surgical Specialties  | Overland Park, KS                        | principal investigator                                  |                                                                                            |
| Suresh                            | Shah       |                       |                  | In-Quest Medical Research, LLC      | Peachtree Corners, GA                    | principal investigator                                  |                                                                                            |
| Carl                              | Griffin    |                       |                  | Lynn Health Science Institute       | Oklahoma City, OK                        | principal investigator                                  |                                                                                            |
| Donald                            | Gardner    |                       |                  | Biopharma Informatic Inc            | Houston, TX                              | principal investigator                                  |                                                                                            |
| Oricel                            | Aguiar     |                       |                  | Next Phase Research Alliance        | Miami, FL                                | principal investigator                                  |                                                                                            |
| Bhola                             | Rama       |                       |                  | Rama Research, LLC                  | Marion, OH                               | principal investigator                                  |                                                                                            |
| Luis                              | Zepeda     |                       |                  | VILO Research Group Inc             | Houston, TX                              | principal investigator                                  |                                                                                            |
| William                           | French     |                       |                  | Harbor-UCLA Medical Center          | Torrance, CA                             | principal investigator                                  |                                                                                            |

## Supplemental Online Content: Nonauthor Collaborators

\*Indicates required information. Only first name, last name, and suffix will appear in PubMed.

| *First Name and Middle Initial(s) | *Last Name | *Suffix (eg, Jr, III) | Academic Degrees | Institution                           | Location (city, state/province, country) | Role or Contribution, eg, chair, principal investigator | Group (if more than 1 Group listed in the byline) and/or Subgroup (eg, Steering Committee) |
|-----------------------------------|------------|-----------------------|------------------|---------------------------------------|------------------------------------------|---------------------------------------------------------|--------------------------------------------------------------------------------------------|
| Matthew                           | Braddock   |                       |                  | Westside Center for Clinical Research | Jacksonville, FL                         | principal investigator                                  |                                                                                            |
| Joseph                            | Boscia     |                       |                  | VitaLink Research                     | Union, SC                                | principal investigator                                  |                                                                                            |
| Oscar                             | Galvez     |                       |                  | Prestige Clinical Research Center     | Miami, FL                                | principal investigator                                  |                                                                                            |
| Bruce                             | Rankin     |                       |                  | Avail Clinical Research               | Deland, FL                               | principal investigator                                  |                                                                                            |
| Stephen                           | Straubing  |                       |                  | South East Clinical Research          | Chiefland, FL                            | principal investigator                                  |                                                                                            |
| Cathy                             | Hurley     |                       |                  | Sante Clinical Research               | Kerrville, TX                            | principal investigator                                  |                                                                                            |
| Jack                              | Rosenfeld  |                       |                  | Green & Seidner Family                | Lansdale, PA                             | principal investigator                                  |                                                                                            |
| Eric                              | Hogan      |                       |                  | Ericksen Research & Development       | Clinton, UT                              | principal investigator                                  |                                                                                            |
| Joseph                            | Risser     |                       |                  | San Diego Family Care                 | San Diego, CA                            | principal investigator                                  |                                                                                            |
| John                              | Willis     |                       |                  | San Gabriel Clinical Research         | Georgetown, TX                           | principal investigator                                  |                                                                                            |
| Nabil                             | Andrawis   |                       |                  | Manassas Clinical Research Center     | Manassas, VA                             | principal investigator                                  |                                                                                            |
| Khalid                            | Ahmed      |                       |                  | Flint Clinical Research               | Flint, MI                                | principal investigator                                  |                                                                                            |
| Barry                             | Bertolet   |                       |                  | Cardiology Associates Research        | Tupelo, MS                               | principal investigator                                  |                                                                                            |
| Giancarlo                         | Guido      |                       |                  | Advantage Clinical trials             | Bronx, NY                                | principal investigator                                  |                                                                                            |
| David                             | Erb        |                       |                  | VitaLink Research                     | Gaffney, SC                              | principal investigator                                  |                                                                                            |



## Supplemental Online Content: Nonauthor Collaborators

\*Indicates required information. Only first name, last name, and suffix will appear in PubMed.

| *First Name and Middle Initial(s) | *Last Name | *Suffix (eg, Jr, III) | Academic Degrees | Institution                           | Location (city, state/province, country) | Role or Contribution, eg, chair, principal investigator | Group (if more than 1 Group listed in the byline) and/or Subgroup (eg, Steering Committee) |
|-----------------------------------|------------|-----------------------|------------------|---------------------------------------|------------------------------------------|---------------------------------------------------------|--------------------------------------------------------------------------------------------|
| Louis                             | Chaykin    |                       |                  | Meridien Research                     | Bradenton, FL                            | principal investigator                                  |                                                                                            |
| James                             | Greenwald  |                       |                  | Medex Healthcare Research Inc         | New York, NY                             | principal investigator                                  |                                                                                            |
| Christin                          | Barlow     |                       |                  | Elite Clinical Research, LLC          | Jackson, MS                              | principal investigator                                  |                                                                                            |
| Michael                           | Dever      |                       |                  | Clinical Neuroscience Solutions Inc   | Orlando, FL                              | principal investigator                                  |                                                                                            |
| Jorge                             | Santander  |                       |                  | APF Research LLC                      | Miami, FL                                | principal investigator                                  |                                                                                            |
| John                              | O'Mahony   |                       |                  | Bluewater Clinical Research Group Inc | Sarnia, ON                               | principal investigator                                  |                                                                                            |
| Naresh                            | Aggarwal   |                       |                  | Aggarwal & Associates LTD             | Brampton, ON                             | principal investigator                                  |                                                                                            |
| Andre                             | Frechette  |                       |                  | Diex Research Quebec Inc.             | Quebec, QC                               | principal investigator                                  |                                                                                            |
| Peter                             | Dzongowski |                       |                  | Milestone Research                    | London, ON                               | principal investigator                                  |                                                                                            |
| Sam                               | Henein     |                       |                  | SKDS Research Inc                     | Newmarket, ON                            | principal investigator                                  |                                                                                            |
| Dennis                            | O'Keefe    |                       |                  | Commonwealth Medical Clinic           | Mount Pearl, NL                          | principal investigator                                  |                                                                                            |
| Thomas                            | Ransom     |                       |                  | Nova Scotia Health Authority          | Halifax, NS                              | principal investigator                                  |                                                                                            |
| Sudip                             | Datta      |                       |                  | Manna Research                        | Burlington, ON                           | principal investigator                                  |                                                                                            |
| Kevin                             | Saunders   |                       |                  | Rivergrove medical clinic             | Winnipeg, MB                             | principal investigator                                  |                                                                                            |
| Ginette                           | Girard     |                       |                  | Diex Research                         | Sherbrooke, QC                           | principal investigator                                  |                                                                                            |

## Supplemental Online Content: Nonauthor Collaborators

\*Indicates required information. Only first name, last name, and suffix will appear in PubMed.

| *First Name and Middle Initial(s) | *Last Name           | *Suffix (eg, Jr, III) | Academic Degrees | Institution                          | Location (city, state/province, country) | Role or Contribution, eg, chair, principal investigator | Group (if more than 1 Group listed in the byline) and/or Subgroup (eg, Steering Committee) |
|-----------------------------------|----------------------|-----------------------|------------------|--------------------------------------|------------------------------------------|---------------------------------------------------------|--------------------------------------------------------------------------------------------|
| Daniel                            | Gaudet               |                       |                  | ECOGENE-21                           | Chicoutimi, QC                           | principal investigator                                  |                                                                                            |
| Laura                             | Castro Castrezana    |                       |                  | Caimed Investigacion en Salud        | Mexico City, Mexico                      | principal investigator                                  |                                                                                            |
| Israel                            | Olvera Alvarez       |                       |                  | Clinicos Asociados BOCM SC           | Mexico City, Mexico                      | principal investigator                                  |                                                                                            |
| Alberto                           | Esteban Bazzoni Ruiz |                       |                  | CIMAB S.A. De C.V                    | Torreon, Mexico                          | principal investigator                                  |                                                                                            |
| Guillermo                         | Antonio              |                       |                  | Hospital cardiologica Aguascalientes | Aguascalientes, Mexico                   | principal investigator                                  |                                                                                            |
| Marco Antonio                     | Alcocer Gamba        |                       |                  | Centro de Estudios                   | Colonia Centro, Mexico                   | principal investigator                                  |                                                                                            |
| Carlos                            | Eduardo              |                       |                  | Medical Care & Research SA de C.V    | Merida, Mexico                           | principal investigator                                  |                                                                                            |
| Jose Hector                       | Sanchez Mijangos     |                       |                  | Centro de Atencion                   | Mexico city, Mexico                      | principal investigator                                  |                                                                                            |
| Martha Ofelia                     | Pereda Quintero      |                       |                  | Centro para el Desarrollo            | Culiacan, Mexico                         | principal investigator                                  |                                                                                            |
| Carlos                            | Ramos                |                       |                  | A+ Research Inc                      | Miami, Florida                           | principal investigator                                  |                                                                                            |
