# Supplementary material for: Effectiveness of a Novel ω-3 Krill Oil Agent in Patients With Severe Hypertriglyceridemia: A Randomized Clinical Trial
Source: PubMed Central journal article supplement — JAMA Netw Open. 2022 Jan 6;5(1):e2141898. doi: 10.1001/jamanetworkopen.2021.41898 (PMC8739762; doi:10.1001/jamanetworkopen.2021.41898), 2022-01-06
Supplement: jamanetwopen-e2141898-s004.pdf [file jamanetwopen-e2141898-s004.pdf]

## Data Sharing Statement

Mozaffarian. Effectiveness of a Novel  $\omega$ -3 Krill Oil Agent in Patients With Severe Hypertriglyceridemia. *JAMA Netw Open*. Published January 06, 2022.  
doi:10.1001/jamanetworkopen.2021.41898

### Data

**Data available:** No
